# Supplementary material for: Inducer-Free Cellulase Production System Based on the Constitutive Expression of Mutated Xyr1 and Ace3 in the Industrial Fungus Trichoderma Reesei
Source: Research Square preprint supplement (doi:10.21203/rs.3.rs-1200930/v1), 2021-12-29
Supplement: Supplementary file 1 [file 3121cf4b674c83027603137d.xlsx]

## Sheet: Table S1
	Table S1 Primer pairs for gene cloning.
	Plasmid		fragment	Forward Primer	Reverse Primer	Templete
	pUC-K001	pUC-118		-	-	-
	pUC-K002	pUC-act1	1	CTAGAGTATTTAAATACGGGGTACGCGTGAAATTG	TGCAGGTATTTAAATTGTGACTGATTAATGTATGA	Genome DNA
			2	ATTTAAATACCTGCAGGCATGCAAGCTT	ATTTAAATACTCTAGAGGATCCCCGGGT	pUC-K001
	pUC-K003	pUC-ace1	1	CTAGAGTATTTAAATTAACCTGATTTCAAC	TGCAGGTATTTAAATAGAGGTAGTCTAGTC	Genome DNA
			2	ATTTAAATACCTGCAGGCATGCAAGCTT	ATTTAAATACTCTAGAGGATCCCCGGGT	pUC-K001
	pUC-K004	pUC-rce1	1	CTAGAGTATTTAAATGGTCAACGGAGGCCAGAAGA	TGCAGGTATTTAAATATTTTGCGCATGACGGGCGA	Genome DNA
			2	ATTTAAATACCTGCAGGCATGCAAGCTT	ATTTAAATACTCTAGAGGATCCCCGGGT	pUC-K001
	pUC-K005	pUC-xyr1	1	CATTAATCAGTCACAATGTTGTCCAATCCTCTCCG	TTTCGCCACGGAGCTTTAGAGGGCCAGACCGGTTC	Genome DNA
			2	ATTTAAATACCTGCAGGCATGCAAGCTT	ATTTAAATACTCTAGAGGATCCCCGGGT	pUC-K001
	pUC-K006	pUC-crt1	1	CATTAATCAGTCACAATGAAGGAGCCGCCCAAGGC	TTTCGCCACGGAGCTTTAAGCCTTCTCGATATTGA	Genome DNA
			2	ATTTAAATACCTGCAGGCATGCAAGCTT	ATTTAAATACTCTAGAGGATCCCCGGGT	pUC-K001
	pUC-K007	pUC-bglr	1	CATTAATCAGTCACAATGACATCGGCCGTCAAGCG	TTTCGCCACGGAGCTCTACCGCAGTGTGTTGAAGT	Genome DNA
			2	ATTTAAATACCTGCAGGCATGCAAGCTT	ATTTAAATACTCTAGAGGATCCCCGGGT	pUC-K001
	pUC-K008	pUC-vib1	1	CATTAATCAGTCACAATGACCGACCTCAGAGGAGA	TTTCGCCACGGAGCTTTAATTACCATGCCAGGAGT	Genome DNA
			2	ATTTAAATACCTGCAGGCATGCAAGCTT	ATTTAAATACTCTAGAGGATCCCCGGGT	pUC-K001
	pUC-K009	pUC-ace2	1	CATTAATCAGTCACAATGGACCTCCGGCAAGCATG	TTTCGCCACGGAGCTTCACTTCAGCAGTCTGGCAC	Genome DNA
			2	ATTTAAATACCTGCAGGCATGCAAGCTT	ATTTAAATACTCTAGAGGATCCCCGGGT	pUC-K001
	pUC-K010	pUC-ace3	1	TAATCAGTCACAATGGCCACAGCGGCCGCGGCAGC	CGCCACGGAGCTTTAGCCAACAACGGTAGTGGACG	Genome DNA
			2	ATTTAAATACCTGCAGGCATGCAAGCTT	ATTTAAATACTCTAGAGGATCCCCGGGT	pUC-K001
	pUC-K011	pUC-cbh1	1	CTAGAGTATTTAAATAGCTCCGTGGCGAAAGCCTG	TGCAGGTATTTAAATGGAGCCATACTGGCGGGAAC	Genome DNA
			2	ATTTAAATACCTGCAGGCATGCAAGCTT	ATTTAAATACTCTAGAGGATCCCCGGGT	pUC-K001
	pUC-K012	pUC-pyr4	1	CTAGAGTATTTAAATCAAACCAGCCAAGGTAGGTA	TGCAGGTATTTAAATATCACATGTCAATGTCACAA	Genome DNA
			2	ATTTAAATACCTGCAGGCATGCAAGCTT	ATTTAAATACTCTAGAGGATCCCCGGGT	pUC-K001
	pUC-K013	pUC-Tr120830	1	CTAGAGTATTTAAATTTTCGCCTTAGCGGTTCCAT	TGCAGGTATTTAAATTTAATACTCGGCAGTCTCGTCAG	Genome DNA
			2	ATTTAAATACCTGCAGGCATGCAAGCTT	ATTTAAATACTCTAGAGGATCCCCGGGT	pUC-K001
	pUC-K014	pUC-Tcbh1-Tr120830-3'	1	CTAGAGTATTTAAATAGCTCCGTGGCGAAAGCCTG	AAGCGCGCGGTACTTCTCGGCTACGTTGTCATCGT	pUC-K011
			2	AAGTACCGCGCGCTTGACAA	TGCAGGTATTTAAATCTGAATGCCCGGTGGTAAGC	pUC-K013
	pUC-K015	pUC-pyr4-Tr120830-3'	1	CTAGAGTATTTAAATCAAACCAGCCAAGGTAGGTA	CCATCACATGTCAATGTCAC	pUC-K012
			2	ATTGACATGTGATGGAAGTACCGCGCGCTTGACAA	TGCAGGTATTTAAATTTGGTTCTTGGTTTGGAGGG	pUC-K013
	pUC-K016	pUC-Tcbh1-Tr120830-3'-pyr4-Tr120830-3' (pyr4*)	1	CTAGAGTATTTAAATAGCTCCGTGGCGAAAGCCTG	CTGAATGCCCGGTGGTAAGC	pUC-K014
			2	CCACCGGGCATTCAGCAAACCAGCCAAGGTAGGTA	TGCAGGTATTTAAATTTGGTTCTTGGTTTGGAGGG	pUC-K015
