# Supplementary material for: Inducer-Free Cellulase Production System Based on the Constitutive Expression of Mutated Xyr1 and Ace3 in the Industrial Fungus Trichoderma Reesei
Source: Research Square preprint supplement (doi:10.21203/rs.3.rs-1200930/v1), 2021-12-29
Supplement: Supplementary file 2 [file 6e1f77bf7c0c9d311c01c18f.xlsx]

## Sheet: Table S2
	Table S2 Constructed expression cassettes and primer pairs
	Plasmid		Homologus region	Promoter	Gene	Terminator	Maker	Homologus region	Fragment	Forward Primer(5'→3')	Reverse Primer(5'→3')	Templete
	pUC-K017	pUC-ΔAce1	ace1-5'	-	-	-	pyr4*	ace1-3'	1	CAAACCAAGAACCAAAAAGATTGCGACACATACAA	TTTCGCCACGGAGCTGGCGGCCGAGATCTGTGTTC	pUC-K003
									2	AGCTCCGTGGCGAAAGCCTG	TTGGTTCTTGGTTTGGAGGG	pUC-K016
	pUC-K018	pUC-ΔRce1	rce1-5'	-	-	-	pyr4*	rce1-3'	1	CAAACCAAGAACCAACATAACTGAGAGAACCAGAA	TTTCGCCACGGAGCTGACTGCCTGCCTCCCAGTTT	pUC-K004
									2	AGCTCCGTGGCGAAAGCCTG	TTGGTTCTTGGTTTGGAGGG	pUC-K016
	pUC-K019	pUC-ΔAce1-Pact1-Xyr1	ace1-5'	act1	xyr1	cbh1	pyr4*	ace1-3'	1	AGCTCCGTGGCGAAAGCCTG	GGCGGCCGAGATCTGTGTTC	pUC-K017
									2	CAGATCTCGGCCGCCACGGGGTACGCGTGAAATTG	TGCAGGTATTTAAATTGTGACTGATTAATGTATGA	pUC-K002
									3	ATGTTGTCCAATCCTCTCCG	TTTCGCCACGGAGCTTTAGAGGGCCAGACCGGTTC	pUC-K005
	pUC-K020	pUC-ΔAce1-Pact1-Xyr1V821F	ace1-5'	act1	xyr1V821F	cbh1	pyr4*	ace1-3'	1	CACGCGTTCTCGGCTGCCGAAGCTATT	AGCCGAGAACGCGTGGCTCGTCGCCGT	pUC-K020
	pUC-K021	pUC-ΔAce1-Pact1-Xyr1A824V	ace1-5'	act1	xyr1A824V	cbh1	pyr4*	ace1-3'	1	TCGGCTGTCGAAGCTATTAGCCAGATT	AGCTTCGACAGCCGATACCGCGTGGCT	pUC-K020
	pUC-K022	pUC-ΔRce1-Pact1-Crt1	rce1-5'	act1	crt1	cbh1	pyr4*	rce1-5'	1	AGCTCCGTGGCGAAAGCCTG	TGTGACTGATTAATGTATGA	pUC-K018
									2	CATTAATCAGTCACAATGAAGGAGCCGCCCAAGGC	TTTCGCCACGGAGCTTTAAGCCTTCTCGATATTGA	pUC-K006
	pUC-K023	pUC-ΔRce1-Pact1-BglR	rce1-5'	act1	bglr	cbh1	pyr4*	rce1-5'	1	AGCTCCGTGGCGAAAGCCTG	TGTGACTGATTAATGTATGA	pUC-K018
									2	CATTAATCAGTCACAATGACATCGGCCGTCAAGCG	TTTCGCCACGGAGCTCTACCGCAGTGTGTTGAAGT	pUC-K007
	pUC-K024	pUC-ΔRce1-Pact1-Vib1	rce1-5'	act1	vib1	cbh1	pyr4*	rce1-5'	1	AGCTCCGTGGCGAAAGCCTG	TGTGACTGATTAATGTATGA	pUC-K018
									2	CATTAATCAGTCACAATGACCGACCTCAGAGGAGA	TTTCGCCACGGAGCTTTAATTACCATGCCAGGAGT	pUC-K008
	pUC-K025	pUC-ΔRce1-Pact1-Ace2	rce1-5'	act1	ace2	cbh1	pyr4*	rce1-5'	1	AGCTCCGTGGCGAAAGCCTG	TGTGACTGATTAATGTATGA	pUC-K018
									2	CATTAATCAGTCACAATGGACCTCCGGCAAGCATG	TTTCGCCACGGAGCTTCACTTCAGCAGTCTGGCAC	pUC-K009
	pUC-K026	pUC-ΔRce1-Pact1-Ace3nom	rce1-5'	act1	ace3nom	cbh1	pyr4*	rce1-5'	1	AGCTCCGTGGCGAAAGCCTG	TGTGACTGATTAATGTATGA	pUC-K018
									2	CATTAATCAGTCACAATGCTGCGCTACTCCCCCGT	TTTCGCCACGGAGCTTTAGCCAACAACGGTAGTGG	pUC-K010
	pUC-K027	pUC-ΔRce1-Pact1-Ace3comp	rce1-5'	act1	ace3comp	cbh1	pyr4*	rce1-5'	1	TAAAGCTCCGTGGCGAAAGCCTG	CATTGTGACTGATTAATGTATGA	pUC-K018
									2	TAATCAGTCACAATGGCCACAGCGGCCGCGGCAGC	CGCCACGGAGCTTTAGCCAACAACGGTAGTGGACG	pUC-K010
